# Supplementary material
Source: publisher site journal article supplement (https://www.spandidos-publications.com/6946/downloadSupplementary)
Supplement: Supplementary file 1 [file downloadSupplementary]

## Sheet: Sheet1
Table SII. Primer sequences used in reverse transcription-quantitative PCR experiments.
Gene	Primer sequence (5'-3')
	Forward	Reverse	Product size, bp
LGALS1	CTGGAGAGTGCCTTCGAGTGC	CGTTGAAGCGAGGGTTGAAGTG	114
ITGA4	TCTGTGCTGTGGACCTCAATGC	CCTTCCTCTCTGATGGTGCTCTG	82
HGF	CCAAGGTCAAGGAGAAGGCTACAG	AGTCATGTCATGCTCGTGAGGATAC	103
RHOC	CAAGACGAGCACACCAGGAGAG	TGAGCACTCAAGGTAGCCAAAGG	114
GAPDH	CAGGAGGCATTGCTGATGAT	GAAGGCTGGGGCTCATTT	138
LGALS1, lectin galactoside-binding soluble 1; ITGA4, integrin subunit α 4; HGF, hepatocyte growth factor; RHOC, Ras homolog gene family member C.
